# Supplementary material
Source: publisher figshare collection journal article supplement (https://acs.figshare.com/ndownloader/files/5727228)
Supplement: Supplementary file 1 [file 5727228]

 
data_zn
 
_audit_creation_method             from_xtal_archive_file_using_CIFIO
_chemical_name_systematic         
;oktakis(\m-acetato-O,O�)bis(\m-acetato-O,O)bis(\m-1,3-bis
(dimethylamino)N,N�-2-propoxo-O) tetra-zinc(II)
;
_chemical_formula_structural       '\Zn4(CH3COO)6(((CH3)2NCH2)2CHO)2\'                                   
_chemical_formula_sum              '\C26H52N4O14Zn4\'
_chemical_formula_weight           906.2                                     

_computing_data_collection         ?                                     
_computing_cell_refinement         ?                                     
_computing_data_reduction          xtal_DIFDAT_SORTRF_ADDREF                                  
_computing_structure_solution      xtal                                 
_computing_structure_refinement    xtal_CRYLSQ                           
_computing_molecular_graphics      xtal                                  
_computing_publication_material    xtal_BONDLA_CIFIO                     
 
_cell_length_a                     10.8650(10)                           
_cell_length_b                     19.237(2)                             
_cell_length_c                     10.0540(10)                           
_cell_angle_alpha                  90.000(2)                             
_cell_angle_beta                   114.4420(10)                          
_cell_angle_gamma                  90.000(2)                             
_cell_volume                       1913.1(3)                             
_cell_formula_units_Z              4                                     
_cell_measurement_temperature      293                                  
_cell_measurement_reflns_used      75                                     
_cell_measurement_theta_min        ?                                     
_cell_measurement_theta_max        ?                                     
_cell_special_details                                                   
;
 ?
;
 
_symmetry_cell_setting             monoclinic                            
_symmetry_space_group_name_H-M     p_1_21/c_1                            
_symmetry_space_group_name_Hall    -p_2ybc                               
loop_
_symmetry_equiv_pos_as_xyz                                              
  +x,+y,+z  -x,1/2+y,1/2-z  -x,-y,-z  +x,1/2-y,1/2+z
 
_exptl_crystal_description         ?                                     
_exptl_crystal_preparation         ?
_exptl_crystal_colour              colourless                                     
_exptl_crystal_size_max            0.61                                     
_exptl_crystal_size_mid            0.44                                     
_exptl_crystal_size_min            0.29                                   
_exptl_crystal_density_diffrn        1.573                               
_exptl_crystal_density_meas        ?                                   
_exptl_crystal_density_method      ?                                  
_exptl_crystal_F_000               936                                 
 
_exptl_absorpt_process_details     ?
_exptl_absorpt_coefficient_mu      2.6                                   
_exptl_absorpt_correction_type     ?                                     
_exptl_absorpt_correction_T_min    ?                                    
_exptl_absorpt_correction_T_max    ?                                   
_exptl_special_details                                                  
;
 ?
;
 
_diffrn_special_details
;
 ?
;
_diffrn_ambient_temperature        293                                 
_diffrn_radiation_wavelength       0.7107                                    
_diffrn_radiation_type             'Mo K \a'                          
_diffrn_radiation_source           xray_tube                                  
 
_diffrn_radiation_monochromator    graphite                                   
_diffrn_radiation_detector         ?                                    
_diffrn_measurement_device         CAD4                                
_diffrn_measurement_method         ?                                  
 
_diffrn_standards_number           3                                    
_diffrn_standards_interval_count   ?                                    
_diffrn_standards_interval_time    ?                                    
_diffrn_standards_decay_%          6.2                                    
 
loop_
_diffrn_standard_refln_index_h                                          
_diffrn_standard_refln_index_k                                          
_diffrn_standard_refln_index_l                                         
  -6 -1 3  3 -6 4  -3 -8 3
 
loop_
_diffrn_attenuator_code
_diffrn_attenuator_scale
  ?  ?
 
_diffrn_reflns_number              .185180+05                           
_diffrn_reflns_av_R_equivalents       .034                             
_diffrn_reflns_av_sigmaI/netI         .027                              
_diffrn_reflns_limit_h_min         -14                                 
_diffrn_reflns_limit_h_max         14                                   
_diffrn_reflns_limit_k_min         -25                                  
_diffrn_reflns_limit_k_max         25                                   
_diffrn_reflns_limit_l_min         -13                                 
_diffrn_reflns_limit_l_max         13                                   
_diffrn_reflns_theta_min              2.06                              
_diffrn_reflns_theta_max             27.99                             
_diffrn_reflns_reduction_process   perpendicular_monochr_Lp             
 
loop_
_atom_type_symbol                                                      
_atom_type_description                                                 
_atom_type_oxidation_number
_atom_type_number_in_cell
_atom_type_scat_dispersion_real                                        
_atom_type_scat_dispersion_imag                                         
_atom_type_scat_source                                                 
  Zn  ?  0  8  .222   1.431  Int._Tables_Vol_IV_Tables_2.2B_and_2.3.1
  O  ?  0  28  .008  .006  Int._Tables_Vol_IV_Tables_2.2B_and_2.3.1
  N  ?  0  8  .004  .003  Int._Tables_Vol_IV_Tables_2.2B_and_2.3.1
  C  ?  0  52  .002  .002  Int._Tables_Vol_IV_Tables_2.2B_and_2.3.1
  H  ?  0  104  0  0  Int._Tables_Vol_IV_Tables_2.2B_and_2.3.1
 
loop_
_atom_site_label                                                        
_atom_site_fract_x                                                      
_atom_site_fract_y                                                     
_atom_site_fract_z                                                      
_atom_site_U_iso_or_equiv                                               
_atom_site_thermal_displace_type                                        
_atom_site_calc_flag                                                    
_atom_site_calc_attached_atom                                          
  Zn1  .71292(8)  .56814(4)  .59022(8)  .0465(4)  Uani  ?  ?
  Zn2  .62581(8)  .42328(4)  .68565(8)  .0421(4)  Uani  ?  ?
  O1  .6657(6)  .5924(3)  .7564(6)  .058(3)  Uani  ?  ?
  O2  .5939(6)  .4931(3)  .8155(6)  .055(3)  Uani  ?  ?
  O3  .8986(6)  .5258(3)  .6979(7)  .067(3)  Uani  ?  ?
  O4  .8386(5)  .4382(3)  .8017(6)  .061(3)  Uani  ?  ?
  O5  .6404(4)  .4698(2)  .5147(5)  .042(2)  Uani  ?  ?
  O6  .6892(9)  .3655(3)  .4615(9)  .085(4)  Uani  ?  ?
  O1'  .5682(5)  .6091(2)  .4157(6)  .051(2)  Uani  ?  ?
  N1'  .6547(7)  .3248(3)  .7853(8)  .055(3)  Uani  ?  ?
  N2'  .8163(8)  .6639(4)  .5720(10)  .069(4)  Uani  ?  ?
  C1  .6194(7)  .5566(4)  .8300(7)  .048(3)  Uani  ?  ?
  C2  .5882(10)  .5946(5)  .9434(10)  .066(4)  Uani  ?  ?
  C3  .9248(8)  .4746(4)  .7823(8)  .055(4)  Uani  ?  ?
  C4  1.0718(10)  .4564(7)  .8664(11)  .081(6)  Uani  ?  ?
  C5  .6869(7)  .4273(4)  .4451(8)  .048(3)  Uani  ?  ?
  C6  .7394(10)  .4612(6)  .3428(10)  .070(5)  Uani  ?  ?
  C1'  .5318(12)  .2832(5)  .6764(15)  .086(6)  Uani  ?  ?
  C2'  .5891(9)  .6764(4)  .3780(9)  .056(4)  Uani  ?  ?
  C3'  .7087(13)  .7072(5)  .494(2)  .131(10)  Uani  ?  ?
  C11'  .7656(13)  .2844(5)  .7827(14)  .086(6)  Uani  ?  ?
  C12'  .670(3)  .3325(8)  .9344(18)  .151(12)  Uani  ?  ?
  C21'  .898(2)  .6913(9)  .722(2)  .146(12)  Uani  ?  ?
  C22'  .9110(16)  .6527(7)  .509(2)  .120(9)  Uani  ?  ?
  H21  .48891  .60966  .89793  .09600  Uiso  ?  ?
  H22  .60695  .56153  1.03239  .09600  Uiso  ?  ?
  H23  .65170  .63784  .97977  .09600  Uiso  ?  ?
  H41  1.11155  .44608  .79084  .12000  Uiso  ?  ?
  H42  1.11918  .49934  .92875  .12000  Uiso  ?  ?
  H43  1.09341  .41379  .93660  .12000  Uiso  ?  ?
  H61  .82380  .47710  .40150  .06200  Uiso  ?  ?
  H62  .74397  .42515  .26800  .06200  Uiso  ?  ?
  H63  .67666  .50218  .28717  .06200  Uiso  ?  ?
  H11'1  .73580  .23750  .77400  .09108  Uiso  ?  ?
  H11'2  .79012  .29885  .69725  .09108  Uiso  ?  ?
  H11'3  .85280  .29109  .88183  .09108  Uiso  ?  ?
  H12'1  .72540  .36910  .98970  .12000  Uiso  ?  ?
  H12'2  .56989  .34004  .92750  .12000  Uiso  ?  ?
  H12'3  .70371  .28474  .98646  .12000  Uiso  ?  ?
  H21'1  .95770  .72370  .72220  .12000  Uiso  ?  ?
  H21'2  .83048  .71497  .76007  .12000  Uiso  ?  ?
  H22'1  .92314  .70139  .47537  .09400  Uiso  ?  ?
  H22'2  1.00322  .63281  .58718  .09400  Uiso  ?  ?
  H22'3  .87371  .61731  .42242  .09400  Uiso  ?  ?
  H1'1  .55255  .26713  .58848  .08700  Uiso  ?  ?
  H1'2  .51745  .23926  .72929  .08700  Uiso  ?  ?
  H2'1  .61482  .67043  .28935  .05500  Uiso  ?  ?
  H21'3  .95087  .65062  .78972  .14100  Uiso  ?  ?
  H3'1  .67738  .73071  .56783  .12700  Uiso  ?  ?
  H3'2  .74498  .74573  .44546  .12700  Uiso  ?  ?
 
loop_
_atom_site_aniso_label                                                  
_atom_site_aniso_U_11                                                   
_atom_site_aniso_U_22                                                   
_atom_site_aniso_U_33                                                   
_atom_site_aniso_U_12                                                   
_atom_site_aniso_U_13                                                  
_atom_site_aniso_U_23                                                  
  Zn1  .0495(5)  .0458(4)  .0444(4)  -.0043(3)  .0197(3)  .0025(3)
  Zn2  .0509(5)  .0390(4)  .0395(4)  .0022(3)  .0219(3)  .0029(3)
  O1  .068(3)  .059(3)  .050(3)  .003(2)  .027(3)  -.003(2)
  O2  .065(3)  .053(3)  .052(3)  .000(2)  .031(2)  -.008(2)
  O3  .046(3)  .073(3)  .070(4)  -.002(3)  .013(3)  .019(3)
  O4  .048(3)  .075(3)  .052(3)  -.000(2)  .012(2)  .014(3)
  O5  .045(2)  .042(2)  .041(2)  .0011(18)  .022(2)  -.0005(18)
  O6  .128(6)  .053(3)  .100(5)  .015(4)  .075(5)  -.006(3)
  O1'  .058(3)  .041(2)  .052(3)  -.009(2)  .021(2)  .006(2)
  N1'  .058(4)  .048(3)  .068(4)  .014(3)  .034(3)  .017(3)
  N2'  .060(4)  .056(4)  .091(5)  -.014(3)  .032(4)  -.005(4)
  C1  .045(4)  .056(4)  .038(3)  .005(3)  .014(3)  -.003(3)
  C2  .071(5)  .066(5)  .064(5)  .010(4)  .031(4)  -.014(4)
  C3  .049(4)  .064(4)  .048(4)  .004(3)  .017(3)  -.005(3)
  C4  .054(5)  .123(8)  .059(5)  .015(5)  .015(4)  .020(5)
  C5  .052(4)  .050(4)  .046(3)  .009(3)  .025(3)  -.001(3)
  C6  .071(5)  .099(7)  .056(5)  .002(5)  .043(4)  -.001(4)
  C1'  .083(7)  .059(5)  .122(9)  .008(5)  .050(7)  .013(5)
  C2'  .068(5)  .043(3)  .057(4)  -.010(3)  .025(4)  .009(3)
  C3'  .080(7)  .048(5)  .26(2)  .000(5)  .065(10)  .046(8)
  C11'  .111(8)  .058(5)  .104(8)  .034(5)  .060(7)  .020(5)
  C12'  .31(3)  .100(9)  .099(9)  .063(12)  .145(15)  .045(8)
  C21'  .184(17)  .110(11)  .147(14)  -.083(12)  .071(13)  -.047(10)
  C22'  .111(9)  .091(8)  .212(17)  .012(7)  .122(11)  .045(9)
 
_atom_sites_solution_primary       sir92
_atom_sites_solution_secondary     fourr # four. Electron density map: Fobs
_atom_sites_solution_hydrogens     difmap # Position of some H atoms were not
#obtained from difference map. They were calculated regarding to geometry of
#neighbouring atoms.   

 
_refine_special_details            sfls:_F_____calc_weight______full_matrix
 
_refine_ls_structure_factor_coef   F                                    
_refine_ls_matrix_type             full                                 
_refine_ls_weighting_scheme        calc                                
_refine_ls_hydrogen_treatment      noref                                    
_refine_ls_extinction_method       none                                 
_refine_ls_extinction_coef         .00000                               
_refine_ls_extinction_expression   ?
_refine_ls_abs_structure_details   none                                 
_refine_ls_abs_structure_Flack     0                                    
_refine_ls_number_reflns           2487                                 
_refine_ls_number_parameters       217                                  
_refine_ls_number_restraints       0                                   
_refine_ls_number_constraints      0                                    
_refine_ls_R_factor_all               .124                             
_refine_ls_R_factor_obs               .061                              
_refine_ls_wR_factor_all              .184                              
_refine_ls_wR_factor_obs              .073                              
_refine_ls_goodness_of_fit_all       1.853                              
_refine_ls_goodness_of_fit_obs        .991                              
_refine_ls_shift/esd_max              .011                              
_refine_ls_shift/esd_mean             .002                                
_refine_diff_density_min              -.919                             
_refine_diff_density_max              .945                              
 
 
_geom_special_details              ?                                    
 
loop_
_geom_bond_atom_site_label_1                                            
_geom_bond_atom_site_label_2                                            
_geom_bond_distance                                                     
_geom_bond_site_symmetry_1                                              
_geom_bond_site_symmetry_2                                              
_geom_bond_publ_flag                                                   
  Zn1  O1  1.996(8)  .  .  ?
  Zn1  O3  2.023(6)  .  .  ?
  Zn1  O5  2.072(4)  .  .  ?
  Zn1  O1'  1.970(5)  .  .  ?
  Zn1  N2'  2.204(9)  .  .  ?
  Zn2  O2  1.999(6)  .  .  ?
  Zn2  O4  2.136(6)  .  .  ?
  Zn2  O5  2.002(6)  .  .  ?
  Zn2  N1'  2.105(7)  .  .  ?
  Zn2  O1'  2.024(5)  .  3_666  ?
  O1  C1  1.256(12)  .  .  ?
  O2  C1  1.248(9)  .  .  ?
  O3  C3  1.252(11)  .  .  ?
  O4  C3  1.251(12)  .  .  ?
  O5  C5  1.307(11)  .  .  ?
  O6  C5  1.197(10)  .  .  ?
  O1'  C2'  1.398(10)  .  .  ?
  N1'  C1'  1.555(13)  .  .  ?
  N1'  C11'  1.441(17)  .  .  ?
  N1'  C12'  1.44(2)  .  .  ?
  N2'  C3'  1.391(14)  .  .  ?
  N2'  C21'  1.49(2)  .  .  ?
  N2'  C22'  1.43(3)  .  .  ?
  C1  C2  1.506(15)  .  .  ?
  C2  H21  1.024(10)  .  .  ?
  C2  H22  1.043(10)  .  .  ?
  C2  H23  1.050(10)  .  .  ?
  C3  C4  1.502(12)  .  .  ?
  C4  H41  1.040(13)  .  .  ?
  C4  H42  1.040(12)  .  .  ?
  C4  H43  1.040(12)  .  .  ?
  C5  C6  1.515(15)  .  .  ?
  C6  H61  .912(9)  .  .  ?
  C6  H62  1.038(11)  .  .  ?
  C6  H63  1.045(10)  .  .  ?
  C1'  H1'1  1.040(18)  .  .  ?
  C1'  H1'2  1.040(14)  .  .  ?
  C1'  C2'  1.434(14)  .  3_666  ?
  C2'  C3'  1.467(16)  .  .  ?
  C2'  H2'1  1.040(11)  .  .  ?
  C3'  H3'1  1.04(2)  .  .  ?
  C3'  H3'2  1.04(2)  .  .  ?
  C11'  H11'1  .948(10)  .  .  ?
  C11'  H11'2  1.041(17)  .  .  ?
  C11'  H11'3  1.060(11)  .  .  ?
  C12'  H12'1  .972(18)  .  .  ?
  C12'  H12'2  1.06(3)  .  .  ?
  C12'  H12'3  1.041(16)  .  .  ?
  C21'  H21'1  .88(2)  .  .  ?
  C21'  H21'2  1.08(3)  .  .  ?
  C21'  H21'3  1.040(18)  .  .  ?
  C22'  H22'1  1.024(17)  .  .  ?
  C22'  H22'2  1.061(15)  .  .  ?
  C22'  H22'3  1.04(2)  .  .  ?
 
loop_
_geom_contact_atom_site_label_1                                         
_geom_contact_atom_site_label_2                                         
_geom_contact_distance                                                 
_geom_contact_site_symmetry_1                                        
_geom_contact_site_symmetry_2                                           
_geom_contact_publ_flag                                                 
                                   ?  ?  ?  ?  ?  ?
 
loop_
_geom_angle_atom_site_label_1                                           
_geom_angle_atom_site_label_2                                          
_geom_angle_atom_site_label_3                                         
_geom_angle                                                           
_geom_angle_site_symmetry_1                                             
_geom_angle_site_symmetry_2                                            
_geom_angle_site_symmetry_3                                           
_geom_angle_publ_flag                                                   
  O1  Zn1  O3  101.0(3)  .  .  .  ?
  O1  Zn1  O5  109.3(2)  .  .  .  ?
  O1  Zn1  O1'  105.4(3)  .  .  .  ?
  O1  Zn1  N2'  101.0(3)  .  .  .  ?
  O3  Zn1  O5  88.4(2)  .  .  .  ?
  O3  Zn1  O1'  152.6(3)  .  .  .  ?
  O3  Zn1  N2'  87.2(3)  .  .  .  ?
  O5  Zn1  O1'  89.72(18)  .  .  .  ?
  O5  Zn1  N2'  149.6(3)  .  .  .  ?
  O1'  Zn1  N2'  80.7(2)  .  .  .  ?
  O2  Zn2  O4  89.6(3)  .  .  .  ?
  O2  Zn2  O5  110.9(2)  .  .  .  ?
  O2  Zn2  N1'  109.1(3)  .  .  .  ?
  O2  Zn2  O1'  96.3(2)  .  .  3_666  ?
  O4  Zn2  O5  87.6(2)  .  .  .  ?
  O4  Zn2  N1'  86.9(3)  .  .  .  ?
  O4  Zn2  O1'  169.8(2)  .  .  3_666  ?
  O5  Zn2  N1'  139.5(3)  .  .  .  ?
  O5  Zn2  O1'  98.0(2)  .  .  3_666  ?
  N1'  Zn2  O1'  83.3(2)  .  .  3_666  ?
  Zn1  O1  C1  132.0(5)  .  .  .  ?
  Zn2  O2  C1  130.2(7)  .  .  .  ?
  Zn1  O3  C3  125.3(6)  .  .  .  ?
  Zn2  O4  C3  134.5(5)  .  .  .  ?
  Zn1  O5  Zn2  104.2(2)  .  .  .  ?
  Zn1  O5  C5  126.6(5)  .  .  .  ?
  Zn2  O5  C5  111.4(4)  .  .  .  ?
  Zn1  O1'  C2'  117.0(4)  .  .  .  ?
  Zn1  O1'  Zn2  127.4(3)  .  .  3_666  ?
  C2'  O1'  Zn2  113.6(4)  .  .  3_666  ?
  Zn2  N1'  C1'  102.5(6)  .  .  .  ?
  Zn2  N1'  C11'  116.2(8)  .  .  .  ?
  Zn2  N1'  C12'  109.8(7)  .  .  .  ?
  C1'  N1'  C11'  100.8(8)  .  .  .  ?
  C1'  N1'  C12'  117.7(14)  .  .  .  ?
  C11'  N1'  C12'  109.7(12)  .  .  .  ?
  Zn1  N2'  C3'  102.4(7)  .  .  .  ?
  Zn1  N2'  C21'  109.3(10)  .  .  .  ?
  Zn1  N2'  C22'  113.2(7)  .  .  .  ?
  C3'  N2'  C21'  111.9(13)  .  .  .  ?
  C3'  N2'  C22'  115.3(15)  .  .  .  ?
  C21'  N2'  C22'  104.8(14)  .  .  .  ?
  O1  C1  O2  126.1(8)  .  .  .  ?
  O1  C1  C2  117.0(7)  .  .  .  ?
  O2  C1  C2  116.9(8)  .  .  .  ?
  C1  C2  H21  109.0(7)  .  .  .  ?
  C1  C2  H22  109.4(8)  .  .  .  ?
  C1  C2  H23  108.9(10)  .  .  .  ?
  H21  C2  H22  110.8(11)  .  .  .  ?
  H21  C2  H23  110.2(9)  .  .  .  ?
  H22  C2  H23  108.5(8)  .  .  .  ?
  O3  C3  O4  124.8(7)  .  .  .  ?
  O3  C3  C4  117.5(9)  .  .  .  ?
  O4  C3  C4  117.7(8)  .  .  .  ?
  C3  C4  H41  107.4(8)  .  .  .  ?
  C3  C4  H42  107.4(10)  .  .  .  ?
  C3  C4  H43  117.5(10)  .  .  .  ?
  H41  C4  H42  109.5(11)  .  .  .  ?
  H41  C4  H43  107.4(11)  .  .  .  ?
  H42  C4  H43  107.4(9)  .  .  .  ?
  O5  C5  O6  122.7(10)  .  .  .  ?
  O5  C5  C6  115.5(7)  .  .  .  ?
  O6  C5  C6  121.8(10)  .  .  .  ?
  C5  C6  H61  105.5(8)  .  .  .  ?
  C5  C6  H62  110.4(9)  .  .  .  ?
  C5  C6  H63  110.0(10)  .  .  .  ?
  H61  C6  H62  111.1(11)  .  .  .  ?
  H61  C6  H63  110.4(11)  .  .  .  ?
  H62  C6  H63  109.3(8)  .  .  .  ?
  N1'  C1'  H1'1  108.9(12)  .  .  .  ?
  N1'  C1'  H1'2  108.9(11)  .  .  .  ?
  N1'  C1'  C2'  111.6(8)  .  .  3_666  ?
  H1'1  C1'  H1'2  109.5(10)  .  .  .  ?
  H1'1  C1'  C2'  109.0(11)  .  .  3_666  ?
  H1'2  C1'  C2'  108.9(13)  .  .  3_666  ?
  O1'  C2'  C3'  110.7(8)  .  .  .  ?
  O1'  C2'  H2'1  105.3(7)  .  .  .  ?
  O1'  C2'  C1'  112.5(9)  .  .  3_666  ?
  C3'  C2'  H2'1  105.3(13)  .  .  .  ?
  C3'  C2'  C1'  116.7(9)  .  .  3_666  ?
  H2'1  C2'  C1'  105.4(9)  .  .  3_666  ?
  N2'  C3'  C2'  117.5(9)  .  .  .  ?
  N2'  C3'  H3'1  107.4(18)  .  .  .  ?
  N2'  C3'  H3'2  107.4(13)  .  .  .  ?
  C2'  C3'  H3'1  107.4(13)  .  .  .  ?
  C2'  C3'  H3'2  107.4(18)  .  .  .  ?
  H3'1  C3'  H3'2  109.5(10)  .  .  .  ?
  N1'  C11'  H11'1  105.1(13)  .  .  .  ?
  N1'  C11'  H11'2  111.6(9)  .  .  .  ?
  N1'  C11'  H11'3  110.4(11)  .  .  .  ?
  H11'1  C11'  H11'2  111.7(13)  .  .  .  ?
  H11'1  C11'  H11'3  110.1(10)  .  .  .  ?
  H11'2  C11'  H11'3  107.9(13)  .  .  .  ?
  N1'  C12'  H12'1  116(2)  .  .  .  ?
  N1'  C12'  H12'2  107.3(14)  .  .  .  ?
  N1'  C12'  H12'3  108.3(16)  .  .  .  ?
  H12'1  C12'  H12'2  108(2)  .  .  .  ?
  H12'1  C12'  H12'3  108.9(17)  .  .  .  ?
  H12'2  C12'  H12'3  108(2)  .  .  .  ?
  N2'  C21'  H21'1  113(2)  .  .  .  ?
  N2'  C21'  H21'2  106.9(16)  .  .  .  ?
  N2'  C21'  H21'3  109.7(14)  .  .  .  ?
  H21'1  C21'  H21'2  107.3(18)  .  .  .  ?
  H21'1  C21'  H21'3  110(2)  .  .  .  ?
  H21'2  C21'  H21'3  110(2)  .  .  .  ?
  N2'  C22'  H22'1  102.8(14)  .  .  .  ?
  N2'  C22'  H22'2  111(2)  .  .  .  ?
  N2'  C22'  H22'3  111.8(14)  .  .  .  ?
  H22'1  C22'  H22'2  110.9(15)  .  .  .  ?
  H22'1  C22'  H22'3  113(2)  .  .  .  ?
  H22'2  C22'  H22'3  107.9(15)  .  .  .  ?
 
loop_
_geom_torsion_atom_site_label_1                                         
_geom_torsion_atom_site_label_2                                        
_geom_torsion_atom_site_label_3                                        
_geom_torsion_atom_site_label_4                                        
_geom_torsion                                                         
_geom_torsion_site_symmetry_1                                         
_geom_torsion_site_symmetry_2                                          
_geom_torsion_site_symmetry_3                                           
_geom_torsion_site_symmetry_4                                        
_geom_torsion_publ_flag                                                 
                                   ?  ?  ?  ?  ?  ?  ?  ?  ?  ?
 
 
_reflns_limit_h_min                0
_reflns_limit_h_max                14
_reflns_limit_k_min                0
_reflns_limit_k_max                25
_reflns_limit_l_min                -13
_reflns_limit_l_max                12
_reflns_number_total               4610                                 
_reflns_number_observed            2502                                 
_reflns_observed_criterion         refl_observed_if_F____>_2.5_sigma(F___)
_reflns_d_resolution_high             .757
_reflns_d_resolution_low             9.891
 
loop_
_reflns_scale_group_code
_reflns_scale_meas_F
  ?   1.6429
 
#===END
data_znp

_audit_creation_method             from_xtal_archive_file_using_CIFIO
_chemical_name_systematic 
;oktakis(\m-propionato-O,O�)bis(\m-propionato-O,O)bis(\m-1,3-bis
(dimethylamino)N,N�-2-propoxo-O) tetra-zinc(II)
;
_chemical_formula_structural       '\Zn4(CH3CH2COO)6(((CH3)2NCH2)2CHO)2\'
_chemical_formula_sum              '\C32H64N4O14Zn4\'                                             
_chemical_formula_weight           990.36                                     
_chemical_melting_point            ?                                     
 
_computing_data_collection         ?                                     
_computing_cell_refinement         ?                                     
_computing_data_reduction          xtal_DIFDAT_SORTRF_ADDREF                                  
_computing_structure_solution      xtal                                  
_computing_structure_refinement    xtal_CRYLSQ                           
_computing_molecular_graphics      xtal                                  
_computing_publication_material    xtal_BONDLA_CIFIO                     
 
_cell_length_a                     11.647(7)                             
_cell_length_b                     10.178(2)                             
_cell_length_c                     19.630(10)                            
_cell_angle_alpha                  90.00(2)                              
_cell_angle_beta                   106.97(5)                             
_cell_angle_gamma                  90.00(2)                              
_cell_volume                       2226(2)                               
_cell_formula_units_Z              4                                     
_cell_measurement_temperature      293                                   
_cell_measurement_reflns_used      75                                     
_cell_measurement_theta_min        7.95                                     
_cell_measurement_theta_max        14.81                                  
_cell_special_details                                                    
;
 ?
;
 
_symmetry_cell_setting             monoclinic                            
_symmetry_space_group_name_H-M     p_1_21/c_1                            
_symmetry_space_group_name_Hall    -p_2ybc                               
loop_
_symmetry_equiv_pos_as_xyz                                               
  +x,+y,+z  -x,1/2+y,1/2-z  -x,-y,-z  +x,1/2-y,1/2+z
 
_exptl_crystal_description         ?                                     
_exptl_crystal_preparation         ?
_exptl_crystal_colour              colourless                                     
_exptl_crystal_size_max            0.27                                     
_exptl_crystal_size_mid            0.23                                    
_exptl_crystal_size_min            0.17                                  
_exptl_crystal_density_diffrn        1.478                               
_exptl_crystal_density_meas        ?                                     
_exptl_crystal_density_method      ?                                     
_exptl_crystal_F_000               1032                                  
 
_exptl_absorpt_process_details     ?
_exptl_absorpt_coefficient_mu      2.24                                     
_exptl_absorpt_correction_type     ?                                     
_exptl_absorpt_correction_T_min    ?                                     
_exptl_absorpt_correction_T_max    ?                                     
_exptl_special_details                                                  
;
 ?
;
 
_diffrn_special_details
;
 ?
;
_diffrn_ambient_temperature        293                                  
_diffrn_radiation_wavelength       0.7107                                    
_diffrn_radiation_type             'Mo K \a'                            
_diffrn_radiation_source           xray_tube                                    
 
_diffrn_radiation_monochromator    graphite                                    
_diffrn_radiation_detector         ?                                    
_diffrn_measurement_device         CAD4                                 
_diffrn_measurement_method         ?                                    
 
_diffrn_standards_number           3                                    
_diffrn_standards_interval_count   ?                                    
_diffrn_standards_interval_time    ?                                    
_diffrn_standards_decay_%          1.88                                    
 
loop_
_diffrn_standard_refln_index_h                                          
_diffrn_standard_refln_index_k                                          
_diffrn_standard_refln_index_l                                         
  0 -4 0  1 -4 5  2 -3  4
 
loop_
_diffrn_attenuator_code
_diffrn_attenuator_scale
  ?  ?
 
_diffrn_reflns_number              .127490+05                           
_diffrn_reflns_av_R_equivalents       .045                              
_diffrn_reflns_av_sigmaI/netI         .068                              
_diffrn_reflns_limit_h_min         -3                                   
_diffrn_reflns_limit_h_max         15                                   
_diffrn_reflns_limit_k_min         -13                                  
_diffrn_reflns_limit_k_max         13                                   
_diffrn_reflns_limit_l_min         -25                                  
_diffrn_reflns_limit_l_max         24                                   
_diffrn_reflns_theta_min              1.83                              
_diffrn_reflns_theta_max             27.85                              
_diffrn_reflns_reduction_process   perpendicular_monochr_Lp             
 
loop_
_atom_type_symbol                                                       
_atom_type_description                                                  
_atom_type_oxidation_number
_atom_type_number_in_cell
_atom_type_scat_dispersion_real                                         
_atom_type_scat_dispersion_imag                                         
_atom_type_scat_source                                                  
  Zn  ?  0  8  .222   1.431  Int._Tables_Vol_IV_Tables_2.2B_and_2.3.1
  O  ?  0  28  .008  .006  Int._Tables_Vol_IV_Tables_2.2B_and_2.3.1
  N  ?  0  8  .004  .003  Int._Tables_Vol_IV_Tables_2.2B_and_2.3.1
  C  ?  0  64  .002  .002  Int._Tables_Vol_IV_Tables_2.2B_and_2.3.1
  H  ?  0  128  0  0  Int._Tables_Vol_IV_Tables_2.2B_and_2.3.1
 
loop_
_atom_site_label                                                        
_atom_site_fract_x                                                      
_atom_site_fract_y                                                      
_atom_site_fract_z                                                     
_atom_site_U_iso_or_equiv                                               
_atom_site_thermal_displace_type                                        
_atom_site_calc_flag                                                    
_atom_site_calc_attached_atom                                           
  Zn1  .19199(9)  .08045(11)  .48477(5)  .0488(5)  Uani  ?  ?
  Zn2  .12082(9)  -.07031(11)  .61292(5)  .0473(5)  Uani  ?  ?
  O1  .2329(6)  -.1074(6)  .4782(3)  .063(4)  Uani  ?  ?
  O2  .1804(6)  -.2158(6)  .5642(3)  .062(3)  Uani  ?  ?
  O3  .3317(6)  .1436(7)  .5663(3)  .069(4)  Uani  ?  ?
  O4  .3103(6)  .0017(8)  .6485(3)  .074(4)  Uani  ?  ?
  O5  .0857(5)  .0926(5)  .5539(2)  .044(3)  Uani  ?  ?
  O6  .0710(7)  .1817(6)  .6536(3)  .074(4)  Uani  ?  ?
  C1  .2305(8)  -.2055(9)  .5161(5)  .054(5)  Uani  ?  ?
  C12  .2969(12)  -.3284(10)  .5015(7)  .090(7)  Uani  ?  ?
  C2  .3548(15)  -.4076(16)  .5639(10)  .138(12)  Uani  ?  ?
  C3  .3612(8)  .0953(11)  .6290(5)  .061(6)  Uani  ?  ?
  C34  .4638(11)  .1624(14)  .6819(6)  .095(8)  Uani  ?  ?
  C4  .4388(17)  .264(3)  .7177(14)  .21(2)  Uani  ?  ?
  C5  .0776(8)  .1952(8)  .5929(4)  .049(5)  Uani  ?  ?
  C56  .0804(9)  .3267(8)  .5585(5)  .058(5)  Uani  ?  ?
  C6  .0641(13)  .4394(10)  .6029(6)  .093(7)  Uani  ?  ?
  O1'  .0513(5)  .1292(5)  .4039(3)  .050(3)  Uani  ?  ?
  N1'  .1392(7)  -.1290(7)  .7196(3)  .052(4)  Uani  ?  ?
  N2'  .2876(7)  .1603(7)  .4124(4)  .058(4)  Uani  ?  ?
  C1'  .0150(9)  -.1184(9)  .7234(4)  .061(5)  Uani  ?  ?
  C2'  .0760(8)  .1739(8)  .3415(4)  .050(5)  Uani  ?  ?
  C3'  .2004(10)  .1349(9)  .3417(5)  .062(5)  Uani  ?  ?
  C11'  .1843(10)  -.2655(10)  .7306(6)  .077(6)  Uani  ?  ?
  C12'  .2172(11)  -.0424(10)  .7748(5)  .076(6)  Uani  ?  ?
  C21'  .4015(10)  .0906(12)  .4192(6)  .085(7)  Uani  ?  ?
  C22'  .3110(9)  .3018(10)  .4257(6)  .071(6)  Uani  ?  ?
  H121  .23432  -.38946  .46543  .07800  Uiso  ?  ?
  H122  .36174  -.29992  .47743  .07800  Uiso  ?  ?
  H21  .41801  -.34847  .60057  .13600  Uiso  ?  ?
  H22  .29059  -.43801  .58857  .13600  Uiso  ?  ?
  H23  .40017  -.49124  .55509  .13600  Uiso  ?  ?
  H341  .53940  .16290  .66190  .09000  Uiso  ?  ?
  H342  .49159  .09080  .72308  .09000  Uiso  ?  ?
  H41  .39655  .33693  .68044  .17100  Uiso  ?  ?
  H42  .37758  .23540  .74496  .17100  Uiso  ?  ?
  H43  .50937  .31210  .75534  .17100  Uiso  ?  ?
  H561  .16440  .33799  .54888  .05500  Uiso  ?  ?
  H562  .01383  .33001  .50992  .05500  Uiso  ?  ?
  H61  .09250  .52500  .59060  .07600  Uiso  ?  ?
  H62  -.02774  .44991  .59793  .07600  Uiso  ?  ?
  H63  .10935  .42074  .65637  .07600  Uiso  ?  ?
  H11'1  .18475  -.29767  .78112  .07400  Uiso  ?  ?
  H11'2  .12940  -.32748  .69242  .07400  Uiso  ?  ?
  H11'3  .27240  -.27488  .72694  .07400  Uiso  ?  ?
  H12'1  .18906  .05548  .76633  .06700  Uiso  ?  ?
  H12'2  .21604  -.07104  .82529  .06700  Uiso  ?  ?
  H12'3  .30530  -.04911  .77127  .06700  Uiso  ?  ?
  H21'1  .38573  -.01212  .41316  .07900  Uiso  ?  ?
  H21'2  .43964  .12029  .37966  .07900  Uiso  ?  ?
  H21'3  .46358  .10578  .46881  .07900  Uiso  ?  ?
  H22'1  .22910  .34780  .40890  .06500  Uiso  ?  ?
  H22'2  .35510  .32300  .47480  .06500  Uiso  ?  ?
  H22'3  .36788  .34112  .39789  .06500  Uiso  ?  ?
  H1'1  .00792  -.16888  .76914  .05500  Uiso  ?  ?
  H1'2  -.00599  -.01919  .72933  .05500  Uiso  ?  ?
  H2'1  .06903  .27673  .34171  .04400  Uiso  ?  ?
  H3'1  .22571  .18901  .30259  .06400  Uiso  ?  ?
  H3'2  .20164  .03516  .32899  .06400  Uiso  ?  ?
 
loop_
_atom_site_aniso_label                                                  
_atom_site_aniso_U_11                                                   
_atom_site_aniso_U_22                                                  
_atom_site_aniso_U_33                                                   
_atom_site_aniso_U_12                                                   
_atom_site_aniso_U_13                                                 
_atom_site_aniso_U_23                                                   
  Zn1  .0631(7)  .0454(6)  .0427(5)  -.0006(6)  .0231(5)  .0014(5)
  Zn2  .0637(7)  .0403(5)  .0428(5)  .0017(6)  .0231(5)  .0020(5)
  O1  .093(5)  .044(4)  .061(4)  .007(3)  .037(4)  .002(3)
  O2  .085(5)  .041(4)  .072(4)  .009(3)  .042(4)  -.004(3)
  O3  .064(4)  .080(4)  .062(4)  -.016(4)  .017(3)  -.001(4)
  O4  .070(5)  .079(5)  .064(4)  -.008(4)  .009(4)  .012(4)
  O5  .060(3)  .036(3)  .039(3)  -.001(3)  .021(3)  -.002(2)
  O6  .138(6)  .043(3)  .056(4)  -.007(4)  .055(4)  -.004(3)
  C1  .049(6)  .049(6)  .068(6)  -.002(5)  .023(5)  -.013(5)
  C12  .127(10)  .045(6)  .116(10)  .012(7)  .063(9)  -.000(6)
  C2  .145(14)  .099(11)  .185(16)  .018(11)  .073(12)  .014(12)
  C3  .053(6)  .078(8)  .045(5)  .001(5)  .007(4)  -.003(5)
  C34  .072(8)  .124(11)  .077(7)  -.011(8)  .004(6)  -.033(7)
  C4  .122(14)  .26(3)  .24(2)  -.042(16)  .043(14)  -.16(2)
  C5  .073(6)  .037(5)  .044(5)  .000(4)  .029(5)  -.004(4)
  C56  .089(7)  .033(4)  .055(5)  -.000(5)  .025(5)  .003(4)
  C6  .165(11)  .041(5)  .083(7)  .008(7)  .052(7)  .008(5)
  O1'  .066(4)  .053(3)  .039(3)  .002(3)  .026(3)  .005(2)
  N1'  .068(5)  .044(4)  .041(4)  -.007(4)  .013(4)  .003(3)
  N2'  .064(5)  .056(5)  .062(5)  -.003(4)  .032(4)  .004(4)
  C1'  .090(8)  .056(6)  .044(5)  -.009(5)  .030(5)  .005(4)
  C2'  .070(6)  .039(4)  .044(4)  -.007(4)  .023(4)  .001(4)
  C3'  .087(7)  .059(6)  .055(5)  -.003(5)  .043(5)  .001(4)
  C11'  .093(8)  .059(6)  .073(6)  .002(6)  .014(6)  .009(5)
  C12'  .106(8)  .070(7)  .049(5)  -.028(6)  .016(5)  -.007(5)
  C21'  .076(7)  .090(8)  .104(8)  .021(7)  .049(6)  .019(7)
  C22'  .073(7)  .055(6)  .084(7)  -.005(5)  .021(6)  .005(5)
 
_atom_sites_solution_primary       sir92
_atom_sites_solution_secondary     fourr # four. Electron density map: Fobs
_atom_sites_solution_hydrogens     difmap # Position of some H atoms were not
#obtained from difference map. They were calculated regarding to geometry of
#neighbouring atoms.   

 
_refine_special_details            sfls:_F_____calc_weight______full_matrix
 
_refine_ls_structure_factor_coef   F                                    
_refine_ls_matrix_type             full                                 
_refine_ls_weighting_scheme        calc                                 
_refine_ls_hydrogen_treatment      noref                                    
_refine_ls_extinction_method       none                                 
_refine_ls_extinction_coef         .00000                               
_refine_ls_extinction_expression   ?
_refine_ls_abs_structure_details   none                                 
_refine_ls_abs_structure_Flack     0                                    
_refine_ls_number_reflns           1708                                 
_refine_ls_number_parameters       244                                 
_refine_ls_number_restraints       0                                    
_refine_ls_number_constraints      0                                    
_refine_ls_R_factor_all               .2                                
_refine_ls_R_factor_obs               .042                              
_refine_ls_wR_factor_all              .268                              
_refine_ls_wR_factor_obs              .047                              
_refine_ls_goodness_of_fit_all       2.998                            
_refine_ls_goodness_of_fit_obs        .95                              
_refine_ls_shift/esd_max              .003                                 
_refine_ls_shift/esd_mean             .0002                                 
_refine_diff_density_min             -2.211                             
_refine_diff_density_max             1.258                              
 
 
_geom_special_details              ?                                    
 
loop_
_geom_bond_atom_site_label_1                                            
_geom_bond_atom_site_label_2                                            
_geom_bond_distance                                                     
_geom_bond_site_symmetry_1                                              
_geom_bond_site_symmetry_2                                              
_geom_bond_publ_flag                                                    
  Zn1  O1  1.984(6)  .  .  ?
  Zn1  O3  2.026(6)  .  .  ?
  Zn1  O5  2.090(6)  .  .  ?
  Zn1  O1'  1.983(5)  .  .  ?
  Zn1  N2'  2.201(9)  .  .  ?
  Zn2  O2  1.994(7)  .  .  ?
  Zn2  O4  2.235(7)  .  .  ?
  Zn2  O5  1.995(5)  .  .  ?
  Zn2  N1'  2.127(7)  .  .  ?
  Zn2  O1'  2.025(6)  .  3_556  ?
  O1  C1  1.250(12)  .  .  ?
  O2  C1  1.251(13)  .  .  ?
  O3  C3  1.276(11)  .  .  ?
  O4  C3  1.241(13)  .  .  ?
  O5  C5  1.315(10)  .  .  ?
  O6  C5  1.224(11)  .  .  ?
  C1  C12  1.541(16)  .  .  ?
  C12  C2  1.46(2)  .  .  ?
  C12  H121  1.058(11)  .  .  ?
  C12  H122  1.042(16)  .  .  ?
  C2  H21  1.056(16)  .  .  ?
  C2  H22  1.05(2)  .  .  ?
  C2  H23  1.042(18)  .  .  ?
  C3  C34  1.499(14)  .  .  ?
  C34  C4  1.33(3)  .  .  ?
  C34  H341  1.063(14)  .  .  ?
  C34  H342  1.066(13)  .  .  ?
  C4  H41  1.06(2)  .  .  ?
  C4  H42  1.05(3)  .  .  ?
  C4  H43  1.05(2)  .  .  ?
  C5  C56  1.504(12)  .  .  ?
  C56  C6  1.485(15)  .  .  ?
  C56  H561  1.055(11)  .  .  ?
  C56  H562  1.040(8)  .  .  ?
  C6  H61  .987(12)  .  .  ?
  C6  H62  1.051(15)  .  .  ?
  C6  H63  1.045(10)  .  .  ?
  O1'  C2'  1.413(11)  .  .  ?
  N1'  C1'  1.475(14)  .  .  ?
  N1'  C11'  1.479(13)  .  .  ?
  N1'  C12'  1.483(11)  .  .  ?
  N2'  C3'  1.483(11)  .  .  ?
  N2'  C21'  1.476(14)  .  .  ?
  N2'  C22'  1.475(13)  .  .  ?
  C1'  H1'1  1.059(9)  .  .  ?
  C1'  H1'2  1.053(9)  .  .  ?
  C1'  C2'  1.508(11)  .  3_556  ?
  C2'  C3'  1.501(15)  .  .  ?
  C2'  H2'1  1.050(8)  .  .  ?
  C3'  H3'1  1.055(11)  .  .  ?
  C3'  H3'2  1.047(10)  .  .  ?
  C11'  H11'1  1.042(11)  .  .  ?
  C11'  H11'2  1.044(10)  .  .  ?
  C11'  H11'3  1.054(13)  .  .  ?
  C12'  H12'1  1.047(10)  .  .  ?
  C12'  H12'2  1.038(10)  .  .  ?
  C12'  H12'3  1.050(13)  .  .  ?
  C21'  H21'1  1.062(13)  .  .  ?
  C21'  H21'2  1.044(14)  .  .  ?
  C21'  H21'3  1.042(10)  .  .  ?
  C22'  H22'1  1.027(10)  .  .  ?
  C22'  H22'2  .975(10)  .  .  ?
  C22'  H22'3  1.052(12)  .  .  ?
 
loop_
_geom_contact_atom_site_label_1                                         
_geom_contact_atom_site_label_2                                         
_geom_contact_distance                                                  
_geom_contact_site_symmetry_1                                           
_geom_contact_site_symmetry_2                                           
_geom_contact_publ_flag                                                 
                                   ?  ?  ?  ?  ?  ?
 
loop_
_geom_angle_atom_site_label_1                                           
_geom_angle_atom_site_label_2                                          
_geom_angle_atom_site_label_3                                           
_geom_angle                                                            
_geom_angle_site_symmetry_1                                             
_geom_angle_site_symmetry_2                                             
_geom_angle_site_symmetry_3                                             
_geom_angle_publ_flag                                                   
  O1  Zn1  O3  101.8(3)  .  .  .  ?
  O1  Zn1  O5  107.3(3)  .  .  .  ?
  O1  Zn1  O1'  110.3(2)  .  .  .  ?
  O1  Zn1  N2'  97.9(3)  .  .  .  ?
  O3  Zn1  O5  87.7(3)  .  .  .  ?
  O3  Zn1  O1'  147.0(3)  .  .  .  ?
  O3  Zn1  N2'  87.2(3)  .  .  .  ?
  O5  Zn1  O1'  89.8(2)  .  .  .  ?
  O5  Zn1  N2'  154.8(3)  .  .  .  ?
  O1'  Zn1  N2'  81.1(3)  .  .  .  ?
  O2  Zn2  O4  86.8(3)  .  .  .  ?
  O2  Zn2  O5  112.3(2)  .  .  .  ?
  O2  Zn2  N1'  108.3(3)  .  .  .  ?
  O2  Zn2  O1'  99.7(2)  .  .  3_556  ?
  O4  Zn2  O5  85.7(2)  .  .  .  ?
  O4  Zn2  N1'  88.7(3)  .  .  .  ?
  O4  Zn2  O1'  171.2(2)  .  .  3_556  ?
  O5  Zn2  N1'  138.6(3)  .  .  .  ?
  O5  Zn2  O1'  97.2(2)  .  .  3_556  ?
  N1'  Zn2  O1'  83.6(3)  .  .  3_556  ?
  Zn1  O1  C1  133.1(7)  .  .  .  ?
  Zn2  O2  C1  127.1(6)  .  .  .  ?
  Zn1  O3  C3  124.6(6)  .  .  .  ?
  Zn2  O4  C3  132.3(6)  .  .  .  ?
  Zn1  O5  Zn2  105.5(3)  .  .  .  ?
  Zn1  O5  C5  125.5(6)  .  .  .  ?
  Zn2  O5  C5  111.0(5)  .  .  .  ?
  O1  C1  O2  127.8(9)  .  .  .  ?
  O1  C1  C12  116.0(10)  .  .  .  ?
  O2  C1  C12  116.2(9)  .  .  .  ?
  C1  C12  C2  115.3(13)  .  .  .  ?
  C1  C12  H121  108.5(10)  .  .  .  ?
  C1  C12  H122  109.1(9)  .  .  .  ?
  C2  C12  H121  107.3(10)  .  .  .  ?
  C2  C12  H122  108.5(13)  .  .  .  ?
  H121  C12  H122  107.9(13)  .  .  .  ?
  C12  C2  H21  108.5(14)  .  .  .  ?
  C12  C2  H22  109.5(14)  .  .  .  ?
  C12  C2  H23  116.5(18)  .  .  .  ?
  H21  C2  H22  107.6(18)  .  .  .  ?
  H21  C2  H23  107.0(15)  .  .  .  ?
  H22  C2  H23  107.5(15)  .  .  .  ?
  O3  C3  O4  125.1(8)  .  .  .  ?
  O3  C3  C34  115.4(10)  .  .  .  ?
  O4  C3  C34  119.5(9)  .  .  .  ?
  C3  C34  C4  117.8(12)  .  .  .  ?
  C3  C34  H341  109.0(10)  .  .  .  ?
  C3  C34  H342  102.6(11)  .  .  .  ?
  C4  C34  H341  121.6(16)  .  .  .  ?
  C4  C34  H342  101.2(15)  .  .  .  ?
  H341  C34  H342  100.5(10)  .  .  .  ?
  C34  C4  H41  108(2)  .  .  .  ?
  C34  C4  H42  110(2)  .  .  .  ?
  C34  C4  H43  119.2(19)  .  .  .  ?
  H41  C4  H42  107.4(19)  .  .  .  ?
  H41  C4  H43  106(2)  .  .  .  ?
  H42  C4  H43  106(2)  .  .  .  ?
  O5  C5  O6  120.9(7)  .  .  .  ?
  O5  C5  C56  115.5(8)  .  .  .  ?
  O6  C5  C56  123.5(8)  .  .  .  ?
  C5  C56  C6  113.6(9)  .  .  .  ?
  C5  C56  H561  108.7(8)  .  .  .  ?
  C5  C56  H562  109.4(7)  .  .  .  ?
  C6  C56  H561  107.8(9)  .  .  .  ?
  C6  C56  H562  109.0(8)  .  .  .  ?
  H561  C56  H562  108.3(9)  .  .  .  ?
  C56  C6  H61  115.4(12)  .  .  .  ?
  C56  C6  H62  108.9(9)  .  .  .  ?
  C56  C6  H63  109.6(9)  .  .  .  ?
  H61  C6  H62  107.0(10)  .  .  .  ?
  H61  C6  H63  107.5(10)  .  .  .  ?
  H62  C6  H63  108.2(13)  .  .  .  ?
  Zn1  O1'  C2'  116.4(5)  .  .  .  ?
  Zn1  O1'  Zn2  127.1(3)  .  .  3_556  ?
  C2'  O1'  Zn2  113.3(4)  .  .  3_556  ?
  Zn2  N1'  C1'  102.2(5)  .  .  .  ?
  Zn2  N1'  C11'  109.8(6)  .  .  .  ?
  Zn2  N1'  C12'  114.6(6)  .  .  .  ?
  C1'  N1'  C11'  111.9(8)  .  .  .  ?
  C1'  N1'  C12'  108.7(8)  .  .  .  ?
  C11'  N1'  C12'  109.6(7)  .  .  .  ?
  Zn1  N2'  C3'  101.7(6)  .  .  .  ?
  Zn1  N2'  C21'  112.0(6)  .  .  .  ?
  Zn1  N2'  C22'  110.4(7)  .  .  .  ?
  C3'  N2'  C21'  110.7(8)  .  .  .  ?
  C3'  N2'  C22'  112.1(7)  .  .  .  ?
  C21'  N2'  C22'  109.8(8)  .  .  .  ?
  N1'  C1'  H1'1  109.2(7)  .  .  .  ?
  N1'  C1'  H1'2  109.8(8)  .  .  .  ?
  N1'  C1'  C2'  112.8(8)  .  .  3_556  ?
  H1'1  C1'  H1'2  107.0(9)  .  .  .  ?
  H1'1  C1'  C2'  109.0(8)  .  .  3_556  ?
  H1'2  C1'  C2'  108.9(7)  .  .  3_556  ?
  O1'  C2'  C3'  110.7(6)  .  .  .  ?
  O1'  C2'  H2'1  106.3(7)  .  .  .  ?
  O1'  C2'  C1'  109.9(7)  .  .  3_556  ?
  C3'  C2'  H2'1  109.8(8)  .  .  .  ?
  C3'  C2'  C1'  110.1(8)  .  .  3_556  ?
  H2'1  C2'  C1'  109.9(7)  .  .  3_556  ?
  N2'  C3'  C2'  110.7(8)  .  .  .  ?
  N2'  C3'  H3'1  109.2(8)  .  .  .  ?
  N2'  C3'  H3'2  109.8(7)  .  .  .  ?
  C2'  C3'  H3'1  109.6(8)  .  .  .  ?
  C2'  C3'  H3'2  109.6(9)  .  .  .  ?
  H3'1  C3'  H3'2  107.8(9)  .  .  .  ?
  N1'  C11'  H11'1  109.8(10)  .  .  .  ?
  N1'  C11'  H11'2  110.2(8)  .  .  .  ?
  N1'  C11'  H11'3  112.7(9)  .  .  .  ?
  H11'1  C11'  H11'2  109.0(10)  .  .  .  ?
  H11'1  C11'  H11'3  107.6(9)  .  .  .  ?
  H11'2  C11'  H11'3  107.5(11)  .  .  .  ?
  N1'  C12'  H12'1  110.7(8)  .  .  .  ?
  N1'  C12'  H12'2  110.8(9)  .  .  .  ?
  N1'  C12'  H12'3  108.4(9)  .  .  .  ?
  H12'1  C12'  H12'2  109.1(10)  .  .  .  ?
  H12'1  C12'  H12'3  108.5(10)  .  .  .  ?
  H12'2  C12'  H12'3  109.2(8)  .  .  .  ?
  N2'  C21'  H21'1  109.9(9)  .  .  .  ?
  N2'  C21'  H21'2  111.1(10)  .  .  .  ?
  N2'  C21'  H21'3  111.9(11)  .  .  .  ?
  H21'1  C21'  H21'2  107.5(12)  .  .  .  ?
  H21'1  C21'  H21'3  107.5(10)  .  .  .  ?
  H21'2  C21'  H21'3  108.8(10)  .  .  .  ?
  N2'  C22'  H22'1  106.4(8)  .  .  .  ?
  N2'  C22'  H22'2  114.1(9)  .  .  .  ?
  N2'  C22'  H22'3  113.1(10)  .  .  .  ?
  H22'1  C22'  H22'2  112.8(11)  .  .  .  ?
  H22'1  C22'  H22'3  109.1(9)  .  .  .  ?
  H22'2  C22'  H22'3  101.5(9)  .  .  .  ?
 
loop_
_geom_torsion_atom_site_label_1                                         
_geom_torsion_atom_site_label_2                                        
_geom_torsion_atom_site_label_3                                         
_geom_torsion_atom_site_label_4                                        
_geom_torsion                                                           
_geom_torsion_site_symmetry_1                                          
_geom_torsion_site_symmetry_2                                          
_geom_torsion_site_symmetry_3                                          
_geom_torsion_site_symmetry_4                                           
_geom_torsion_publ_flag                                                 
                                   ?  ?  ?  ?  ?  ?  ?  ?  ?  ?
 
 
_reflns_limit_h_min                0
_reflns_limit_h_max                15
_reflns_limit_k_min                0
_reflns_limit_k_max                13
_reflns_limit_l_min                -25
_reflns_limit_l_max                24
_reflns_number_total               5293                                 
_reflns_number_observed            1709                                 
_reflns_observed_criterion         refl_observed_if_F____>_2.5_sigma(F___)
_reflns_d_resolution_high             .761
_reflns_d_resolution_low            11.14
 
loop_
_reflns_scale_group_code
_reflns_scale_meas_F
  ?   4.6203
 
#===END


 
data_k149
 
_audit_creation_method            SHELXL-97
_chemical_name_systematic
;
 catena tetrakis(\m-acetato-O,O�)(\m-acetato-O,O)(\m-1,3-bis
(dimethylamino)N,N�-2-propoxo-O) di-zinc(II)
;

       
_chemical_formula_sum         
 'C14 H26 Cl2 D2 N2 O7 Zn2'
_chemical_formula_weight          540.04
 
loop_
 _atom_type_symbol
 _atom_type_description
 _atom_type_scat_dispersion_real
 _atom_type_scat_dispersion_imag
 _atom_type_scat_source
 'C'  'C'   0.0033   0.0016
 'International Tables Vol C Tables 4.2.6.8 and 6.1.1.4'
 'H'  'H'   0.0000   0.0000
 'International Tables Vol C Tables 4.2.6.8 and 6.1.1.4'
 'N'  'N'   0.0061   0.0033
 'International Tables Vol C Tables 4.2.6.8 and 6.1.1.4'
 'O'  'O'   0.0106   0.0060
 'International Tables Vol C Tables 4.2.6.8 and 6.1.1.4'
 'Zn'  'Zn'   0.2839   1.4301
 'International Tables Vol C Tables 4.2.6.8 and 6.1.1.4'
 'Cl'  'Cl'   0.1484   0.1585
 'International Tables Vol C Tables 4.2.6.8 and 6.1.1.4'
 'D'  'D'   0.0000   0.0000
 'International Tables Vol C Tables 4.2.6.8 and 6.1.1.4'
 
_symmetry_cell_setting            ?
_symmetry_space_group_name_H-M    ?
 
loop_
 _symmetry_equiv_pos_as_xyz
 'x, y, z'
 '-x+1/2, y+1/2, -z+1/2'
 '-x, -y, -z'
 'x-1/2, -y-1/2, z-1/2'
 
_cell_length_a                    10.7671(2)
_cell_length_b                    13.4855(3)
_cell_length_c                    15.5292(4)
_cell_angle_alpha                 90.00
_cell_angle_beta                  90.7610(10)
_cell_angle_gamma                 90.00
_cell_volume                      2254.64(9)
_cell_formula_units_Z             4
_cell_measurement_temperature     200(2)
_cell_measurement_reflns_used     ?
_cell_measurement_theta_min       ?
_cell_measurement_theta_max       ?
 
_exptl_crystal_description        ?
_exptl_crystal_colour             colourless
_exptl_crystal_size_max           0.3
_exptl_crystal_size_mid           0.15
_exptl_crystal_size_min           0.1
_exptl_crystal_density_meas       ?
_exptl_crystal_density_diffrn     1.591
_exptl_crystal_density_method     'not measured'
_exptl_crystal_F_000              1104
_exptl_absorpt_coefficient_mu     2.399
_exptl_absorpt_correction_type    ?
_exptl_absorpt_correction_T_min   ?
_exptl_absorpt_correction_T_max   ?
_exptl_absorpt_process_details    ?
 
_exptl_special_details
;
 ?
;
 
_diffrn_ambient_temperature       200(2)
_diffrn_radiation_wavelength      0.71073
_diffrn_radiation_type            MoK\a
_diffrn_radiation_source          'fine-focus sealed tube'
_diffrn_radiation_monochromator   graphite
_diffrn_measurement_device_type   ?
_diffrn_measurement_method        ?
_diffrn_detector_area_resol_mean  ?
_diffrn_standards_number          ?
_diffrn_standards_interval_count  ?
_diffrn_standards_interval_time   ?
_diffrn_standards_decay_%         ?
_diffrn_reflns_number             9663
_diffrn_reflns_av_R_equivalents   0.0299
_diffrn_reflns_av_sigmaI/netI     0.0400
_diffrn_reflns_limit_h_min        -13
_diffrn_reflns_limit_h_max        13
_diffrn_reflns_limit_k_min        -17
_diffrn_reflns_limit_k_max        17
_diffrn_reflns_limit_l_min        -20
_diffrn_reflns_limit_l_max        20
_diffrn_reflns_theta_min          2.00
_diffrn_reflns_theta_max          27.46
_reflns_number_total              5130
_reflns_number_gt                 3879
_reflns_threshold_expression      >2sigma(I)
 
_computing_data_collection        ?
_computing_cell_refinement        ?
_computing_data_reduction         ?
_computing_structure_solution     ?
_computing_structure_refinement   'SHELXL-97 (Sheldrick, 1997)'
_computing_molecular_graphics     ?
_computing_publication_material   ?
 
_refine_special_details
;
 Refinement of F^2^ against ALL reflections.  The weighted R-factor wR and
 goodness of fit S are based on F^2^, conventional R-factors R are based
 on F, with F set to zero for negative F^2^. The threshold expression of
 F^2^ > 2sigma(F^2^) is used only for calculating R-factors(gt) etc. and is
 not relevant to the choice of reflections for refinement.  R-factors based
 on F^2^ are statistically about twice as large as those based on F, and R-
 factors based on ALL data will be even larger.
;
 
_refine_ls_structure_factor_coef  Fsqd
_refine_ls_matrix_type            full
_refine_ls_weighting_scheme       calc
_refine_ls_weighting_details
 'calc w=1/[\s^2^(Fo^2^)+(0.0395P)^2^+2.5944P] where P=(Fo^2^+2Fc^2^)/3'
_atom_sites_solution_primary      SIR92
_atom_sites_solution_secondary    difmap
_atom_sites_solution_hydrogens    geom
_refine_ls_hydrogen_treatment     mixed
_refine_ls_extinction_method      none
_refine_ls_extinction_coef        ?
_refine_ls_number_reflns          5130
_refine_ls_number_parameters      367
_refine_ls_number_restraints      0
_refine_ls_R_factor_all           0.0612
_refine_ls_R_factor_gt            0.0398
_refine_ls_wR_factor_ref          0.0987
_refine_ls_wR_factor_gt           0.0882
_refine_ls_goodness_of_fit_ref    1.036
_refine_ls_restrained_S_all       1.036
_refine_ls_shift/su_max           0.014
_refine_ls_shift/su_mean          0.004
 
loop_
 _atom_site_label
 _atom_site_type_symbol
 _atom_site_fract_x
 _atom_site_fract_y
 _atom_site_fract_z
 _atom_site_U_iso_or_equiv
 _atom_site_adp_type
 _atom_site_occupancy
 _atom_site_symmetry_multiplicity
 _atom_site_calc_flag
 _atom_site_refinement_flags
 _atom_site_disorder_assembly
 _atom_site_disorder_group
Zn1 Zn 0.19396(3) 0.89467(2) 0.21425(2) 0.02830(11) Uani 1 1 d . . .
Zn2 Zn 0.19693(3) 0.62920(2) 0.21857(2) 0.02972(11) Uani 1 1 d . . .
N2' N -0.0070(2) 0.94187(17) 0.20566(18) 0.0341(6) Uani 1 1 d . . .
N1' N -0.0035(2) 0.57822(18) 0.2201(2) 0.0405(7) Uani 1 1 d . . .
O1' O 0.11648(18) 0.75987(13) 0.20703(14) 0.0317(5) Uani 1 1 d . . .
C1' C -0.0685(3) 0.6653(2) 0.1841(3) 0.0448(9) Uani 1 1 d . . .
C2' C -0.0129(3) 0.7601(2) 0.2204(2) 0.0342(7) Uani 1 1 d . . .
C3' C -0.0692(3) 0.8497(2) 0.1762(3) 0.0411(8) Uani 1 1 d . . .
C11' C -0.0293(4) 0.4904(3) 0.1657(3) 0.0523(10) Uani 1 1 d . . .
C12' C -0.0453(4) 0.5569(3) 0.3079(3) 0.0517(10) Uani 1 1 d . . .
C21' C -0.0406(4) 1.0237(3) 0.1465(3) 0.0439(9) Uani 1 1 d . . .
C22' C -0.0496(4) 0.9694(3) 0.2922(3) 0.0436(8) Uani 1 1 d . . .
O3 O 0.3654(2) 0.84559(15) 0.18066(17) 0.0440(6) Uani 1 1 d . . .
O4 O 0.3732(2) 0.68704(16) 0.22113(18) 0.0487(6) Uani 1 1 d . . .
C3 C 0.4206(3) 0.7651(2) 0.1943(2) 0.0358(7) Uani 1 1 d . . .
C4 C 0.5596(4) 0.7631(3) 0.1792(4) 0.0664(14) Uani 1 1 d . . .
O1 O 0.2150(2) 0.90281(16) 0.34371(14) 0.0392(5) Uani 1 1 d . . .
O2 O 0.2665(2) 1.05508(16) 0.38919(15) 0.0441(6) Uani 1 1 d . . .
C1 C 0.2308(3) 0.9672(2) 0.4008(2) 0.0346(7) Uani 1 1 d . . .
C2 C 0.2064(5) 0.9369(3) 0.4930(3) 0.0638(13) Uani 1 1 d . . .
O5 O 0.25404(19) 1.03758(14) 0.18507(13) 0.0309(5) Uani 1 1 d . . .
C5 C 0.2460(3) 1.0473(2) 0.1021(2) 0.0387(7) Uani 1 1 d . . .
O6 O 0.2118(3) 0.97841(19) 0.05642(17) 0.0567(7) Uani 1 1 d . . .
C6 C 0.2745(5) 1.1483(4) 0.0660(4) 0.0678(14) Uani 1 1 d . . .
Cl1 Cl 0.5329(4) 0.76847(18) 0.45172(16) 0.0751(12) Uani 0.533(8) 1 d P A 1
Cl1A Cl 0.6523(10) 0.7683(3) 0.4162(5) 0.178(6) Uani 0.467(8) 1 d P A 2
Cl2 Cl 0.7965(4) 0.7744(2) 0.4163(2) 0.116(2) Uani 0.559(6) 1 d P A 1
Cl2A Cl 0.9119(5) 0.7779(2) 0.4734(2) 0.0930(18) Uani 0.441(6) 1 d P A 2
C7 C 0.7142(11) 0.7445(4) 0.4953(4) 0.140(4) Uani 1 1 d . . .
H2A H 0.229(9) 0.976(7) 0.527(6) 0.209 Uiso 1 1 d . . .
H2B H 0.243(9) 0.870(7) 0.508(6) 0.209 Uiso 1 1 d . . .
H2C H 0.129(8) 0.929(8) 0.502(6) 0.209 Uiso 1 1 d . . .
H4A H 0.581(8) 0.821(7) 0.168(6) 0.209 Uiso 1 1 d . . .
H4B H 0.558(10) 0.755(7) 0.114(7) 0.209 Uiso 1 1 d . . .
H4C H 0.596(9) 0.708(7) 0.178(6) 0.209 Uiso 1 1 d . . .
D7A D 0.708(8) 0.778(6) 0.536(5) 0.167 Uiso 1 1 d . . .
D7B D 0.740(7) 0.679(6) 0.504(5) 0.167 Uiso 1 1 d . . .
H3'1 H -0.051(3) 0.846(2) 0.117(2) 0.034(9) Uiso 1 1 d . . .
H3'2 H -0.152(4) 0.856(3) 0.190(2) 0.048(11) Uiso 1 1 d . . .
H1'1 H -0.156(3) 0.664(2) 0.192(2) 0.038(9) Uiso 1 1 d . . .
H1'2 H -0.048(3) 0.667(2) 0.124(2) 0.036(9) Uiso 1 1 d . . .
H211 H -0.129(4) 1.034(3) 0.145(2) 0.050(10) Uiso 1 1 d . . .
H212 H 0.005(3) 1.085(3) 0.170(2) 0.044(9) Uiso 1 1 d . . .
H213 H -0.015(3) 1.006(3) 0.090(3) 0.055(12) Uiso 1 1 d . . .
H111 H 0.023(3) 0.437(3) 0.187(2) 0.037(9) Uiso 1 1 d . . .
H112 H 0.001(3) 0.502(3) 0.108(3) 0.049(11) Uiso 1 1 d . . .
H113 H -0.118(4) 0.473(3) 0.167(2) 0.059(11) Uiso 1 1 d . . .
H2'1 H -0.031(3) 0.764(2) 0.281(3) 0.044(10) Uiso 1 1 d . . .
H221 H 0.004(3) 1.032(3) 0.311(2) 0.053(10) Uiso 1 1 d . . .
H222 H -0.141(4) 0.985(3) 0.290(3) 0.078(14) Uiso 1 1 d . . .
H223 H -0.028(3) 0.916(3) 0.333(2) 0.051(11) Uiso 1 1 d . . .
H121 H -0.031(3) 0.615(3) 0.344(2) 0.042(10) Uiso 1 1 d . . .
H122 H -0.128(4) 0.546(3) 0.308(3) 0.065(13) Uiso 1 1 d . . .
H123 H 0.003(3) 0.499(3) 0.332(2) 0.050(10) Uiso 1 1 d . . .
H61 H 0.232(5) 1.153(4) 0.017(4) 0.094(18) Uiso 1 1 d . . .
H62 H 0.278(6) 1.210(6) 0.106(5) 0.14(2) Uiso 1 1 d . . .
H6 H 0.340(7) 1.154(6) 0.052(6) 0.165 Uiso 1 1 d . . .
 
loop_
 _atom_site_aniso_label
 _atom_site_aniso_U_11
 _atom_site_aniso_U_22
 _atom_site_aniso_U_33
 _atom_site_aniso_U_23
 _atom_site_aniso_U_13
 _atom_site_aniso_U_12
Zn1 0.02983(19) 0.02030(17) 0.0347(2) -0.00070(13) -0.00038(14) -0.00022(13)
Zn2 0.0313(2) 0.02107(18) 0.0368(2) 0.00081(13) -0.00011(15) 0.00183(13)
N2' 0.0326(14) 0.0219(12) 0.0476(16) -0.0007(11) -0.0038(12) 0.0013(10)
N1' 0.0335(14) 0.0221(12) 0.066(2) -0.0008(12) -0.0060(13) 0.0001(10)
O1' 0.0267(10) 0.0213(10) 0.0470(13) -0.0024(9) -0.0031(9) 0.0005(8)
C1' 0.0315(19) 0.0277(16) 0.075(3) -0.0033(17) -0.0132(18) -0.0007(13)
C2' 0.0284(15) 0.0220(14) 0.052(2) -0.0038(13) -0.0050(14) -0.0005(11)
C3' 0.0328(19) 0.0307(17) 0.059(2) -0.0040(16) -0.0087(17) 0.0034(13)
C11' 0.042(2) 0.0268(18) 0.088(3) -0.0112(19) -0.013(2) -0.0028(15)
C12' 0.040(2) 0.037(2) 0.079(3) 0.002(2) 0.010(2) -0.0020(17)
C21' 0.037(2) 0.0334(18) 0.061(3) 0.0089(17) -0.0080(18) 0.0062(15)
C22' 0.038(2) 0.0362(19) 0.056(2) -0.0062(17) 0.0068(17) 0.0030(15)
O3 0.0379(13) 0.0244(11) 0.0699(17) 0.0031(11) 0.0131(11) 0.0036(9)
O4 0.0322(12) 0.0311(12) 0.0829(19) 0.0179(12) 0.0023(12) -0.0009(9)
C3 0.0339(16) 0.0275(15) 0.0463(19) -0.0015(13) 0.0058(14) 0.0013(13)
C4 0.042(2) 0.038(2) 0.120(4) 0.006(2) 0.030(2) 0.0030(17)
O1 0.0517(14) 0.0314(11) 0.0342(12) 0.0016(9) -0.0078(10) -0.0028(10)
O2 0.0594(15) 0.0333(12) 0.0396(13) -0.0008(10) 0.0046(11) -0.0097(11)
C1 0.0376(17) 0.0344(17) 0.0318(16) 0.0026(13) -0.0048(13) -0.0021(13)
C2 0.102(4) 0.054(2) 0.035(2) 0.0063(18) -0.001(2) -0.019(2)
O5 0.0383(12) 0.0226(10) 0.0318(11) 0.0013(8) 0.0011(9) -0.0010(8)
C5 0.0430(19) 0.0355(17) 0.0377(18) 0.0015(14) 0.0020(14) 0.0027(14)
O6 0.0709(18) 0.0491(15) 0.0498(16) -0.0173(13) -0.0093(13) 0.0003(13)
C6 0.089(4) 0.060(3) 0.055(3) 0.027(2) -0.007(3) -0.014(3)
Cl1 0.101(3) 0.0639(14) 0.0604(14) 0.0018(10) -0.0053(13) -0.0010(13)
Cl1A 0.296(14) 0.068(2) 0.167(6) 0.029(3) -0.163(9) -0.030(4)
Cl2 0.143(4) 0.103(2) 0.106(3) 0.0172(18) 0.078(3) 0.012(2)
Cl2A 0.133(4) 0.0740(19) 0.073(2) 0.0040(15) 0.049(2) -0.0033(18)
C7 0.325(13) 0.049(3) 0.046(3) -0.001(2) 0.035(5) -0.023(5)
 
_geom_special_details
;
 All esds (except the esd in the dihedral angle between two l.s. planes)
 are estimated using the full covariance matrix.  The cell esds are taken
 into account individually in the estimation of esds in distances, angles
 and torsion angles; correlations between esds in cell parameters are only
 used when they are defined by crystal symmetry.  An approximate (isotropic)
 treatment of cell esds is used for estimating esds involving l.s. planes.
;
 
loop_
 _geom_bond_atom_site_label_1
 _geom_bond_atom_site_label_2
 _geom_bond_distance
 _geom_bond_site_symmetry_2
 _geom_bond_publ_flag
Zn1 O1' 2.0026(19) . ?
Zn1 O1 2.023(2) . ?
Zn1 O3 2.035(2) . ?
Zn1 O5 2.0847(19) . ?
Zn1 N2' 2.257(2) . ?
Zn2 O1' 1.9706(19) . ?
Zn2 O2 1.993(2) 2_545 ?
Zn2 O5 2.006(2) 2_545 ?
Zn2 O4 2.052(2) . ?
Zn2 N1' 2.266(3) . ?
N2' C22' 1.473(4) . ?
N2' C21' 1.478(4) . ?
N2' C3' 1.482(4) . ?
N1' C12' 1.471(5) . ?
N1' C1' 1.473(4) . ?
N1' C11' 1.478(4) . ?
O1' C2' 1.411(4) . ?
C1' H1'1 0.95(3) . ?
C1' H1'2 0.96(3) . ?
C1' C2' 1.517(4) . ?
C2' H2'1 0.97(4) . ?
C2' C3' 1.512(4) . ?
C3' H3'2 0.93(4) . ?
C3' H3'1 0.94(3) . ?
C11' H111 0.97(4) . ?
C11' H112 0.97(4) . ?
C11' H113 0.99(4) . ?
C12' H122 0.91(4) . ?
C12' H121 0.97(4) . ?
C12' H123 1.01(4) . ?
C21' H213 0.96(4) . ?
C21' H211 0.96(4) . ?
C21' H212 1.03(4) . ?
C22' H223 0.99(4) . ?
C22' H222 1.00(5) . ?
C22' H221 1.06(4) . ?
O3 C3 1.254(4) . ?
O4 C3 1.244(4) . ?
C3 C4 1.519(5) . ?
C4 H4C 0.84(10) . ?
C4 H4A 0.84(10) . ?
C4 H4B 1.01(10) . ?
O1 C1 1.251(4) . ?
O2 C1 1.260(4) . ?
O2 Zn2 1.993(2) 2 ?
C1 C2 1.514(5) . ?
C2 H2A 0.79(9) . ?
C2 H2C 0.86(9) . ?
C2 H2B 1.02(10) . ?
O5 C5 1.296(4) . ?
O5 Zn2 2.006(2) 2 ?
C5 O6 1.223(4) . ?
C5 C6 1.507(5) . ?
C6 H61 0.88(6) . ?
C6 H62 1.04(8) . ?
C6 H6 0.75(8) . ?
Cl1 C7 2.083(13) . ?
Cl1A C7 1.426(9) . ?
Cl2 C7 1.576(8) . ?
Cl2A C7 2.207(12) . ?
 
loop_
 _geom_angle_atom_site_label_1
 _geom_angle_atom_site_label_2
 _geom_angle_atom_site_label_3
 _geom_angle
 _geom_angle_site_symmetry_1
 _geom_angle_site_symmetry_3
 _geom_angle_publ_flag
O1' Zn1 O1 98.39(9) . . ?
O1' Zn1 O3 93.96(8) . . ?
O1 Zn1 O3 100.52(10) . . ?
O1' Zn1 O5 163.19(8) . . ?
O1 Zn1 O5 97.75(8) . . ?
O3 Zn1 O5 87.70(8) . . ?
O1' Zn1 N2' 81.63(8) . . ?
O1 Zn1 N2' 97.93(10) . . ?
O3 Zn1 N2' 161.48(10) . . ?
O5 Zn1 N2' 91.51(8) . . ?
O1' Zn2 O2 117.61(9) . 2_545 ?
O1' Zn2 O5 136.86(9) . 2_545 ?
O2 Zn2 O5 105.34(9) 2_545 2_545 ?
O1' Zn2 O4 93.85(8) . . ?
O2 Zn2 O4 90.80(11) 2_545 . ?
O5 Zn2 O4 89.17(9) 2_545 . ?
O1' Zn2 N1' 81.64(9) . . ?
O2 Zn2 N1' 93.17(10) 2_545 . ?
O5 Zn2 N1' 92.68(9) 2_545 . ?
O4 Zn2 N1' 175.02(10) . . ?
C22' N2' C21' 107.6(3) . . ?
C22' N2' C3' 110.3(3) . . ?
C21' N2' C3' 109.2(3) . . ?
C22' N2' Zn1 109.1(2) . . ?
C21' N2' Zn1 118.3(2) . . ?
C3' N2' Zn1 102.16(18) . . ?
C12' N1' C1' 111.0(3) . . ?
C12' N1' C11' 108.4(3) . . ?
C1' N1' C11' 109.7(3) . . ?
C12' N1' Zn2 111.8(2) . . ?
C1' N1' Zn2 101.6(2) . . ?
C11' N1' Zn2 114.1(2) . . ?
C2' O1' Zn2 114.96(16) . . ?
C2' O1' Zn1 113.65(16) . . ?
Zn2 O1' Zn1 128.63(10) . . ?
H1'1 C1' H1'2 112(3) . . ?
H1'1 C1' N1' 114(2) . . ?
H1'2 C1' N1' 106(2) . . ?
H1'1 C1' C2' 111(2) . . ?
H1'2 C1' C2' 104(2) . . ?
N1' C1' C2' 110.3(3) . . ?
H2'1 C2' O1' 111(2) . . ?
H2'1 C2' C3' 109(2) . . ?
O1' C2' C3' 109.0(3) . . ?
H2'1 C2' C1' 109(2) . . ?
O1' C2' C1' 109.2(3) . . ?
C3' C2' C1' 110.5(3) . . ?
H3'2 C3' H3'1 117(3) . . ?
H3'2 C3' N2' 107(2) . . ?
H3'1 C3' N2' 104(2) . . ?
H3'2 C3' C2' 110(2) . . ?
H3'1 C3' C2' 108(2) . . ?
N2' C3' C2' 110.7(3) . . ?
H111 C11' H112 104(3) . . ?
H111 C11' H113 112(3) . . ?
H112 C11' H113 113(3) . . ?
H111 C11' N1' 107(2) . . ?
H112 C11' N1' 110(2) . . ?
H113 C11' N1' 111(2) . . ?
H122 C12' H121 106(3) . . ?
H122 C12' H123 112(3) . . ?
H121 C12' H123 110(3) . . ?
H122 C12' N1' 111(3) . . ?
H121 C12' N1' 109(2) . . ?
H123 C12' N1' 109(2) . . ?
H213 C21' H211 109(3) . . ?
H213 C21' H212 112(3) . . ?
H211 C21' H212 111(3) . . ?
H213 C21' N2' 108(2) . . ?
H211 C21' N2' 111(2) . . ?
H212 C21' N2' 106(2) . . ?
H223 C22' H222 113(3) . . ?
H223 C22' H221 106(3) . . ?
H222 C22' H221 112(3) . . ?
H223 C22' N2' 109(2) . . ?
H222 C22' N2' 110(2) . . ?
H221 C22' N2' 106(2) . . ?
C3 O3 Zn1 131.9(2) . . ?
C3 O4 Zn2 134.3(2) . . ?
O4 C3 O3 126.4(3) . . ?
O4 C3 C4 116.5(3) . . ?
O3 C3 C4 117.1(3) . . ?
H4C C4 H4A 134(9) . . ?
H4C C4 H4B 84(7) . . ?
H4A C4 H4B 84(7) . . ?
H4C C4 C3 118(6) . . ?
H4A C4 C3 107(6) . . ?
H4B C4 C3 99(6) . . ?
C1 O1 Zn1 139.0(2) . . ?
C1 O2 Zn2 131.0(2) . 2 ?
O1 C1 O2 126.1(3) . . ?
O1 C1 C2 117.4(3) . . ?
O2 C1 C2 116.5(3) . . ?
H2A C2 H2C 105(8) . . ?
H2A C2 H2B 109(8) . . ?
H2C C2 H2B 104(7) . . ?
H2A C2 C1 114(7) . . ?
H2C C2 C1 111(6) . . ?
H2B C2 C1 113(5) . . ?
C5 O5 Zn2 133.8(2) . 2 ?
C5 O5 Zn1 106.99(19) . . ?
Zn2 O5 Zn1 119.12(10) 2 . ?
O6 C5 O5 121.1(3) . . ?
O6 C5 C6 122.2(4) . . ?
O5 C5 C6 116.7(3) . . ?
H61 C6 H62 118(5) . . ?
H61 C6 H6 103(7) . . ?
H62 C6 H6 93(7) . . ?
H61 C6 C5 106(4) . . ?
H62 C6 C5 120(4) . . ?
H6 C6 C5 114(7) . . ?
Cl1A C7 Cl2 62.1(6) . . ?
Cl1A C7 Cl1 42.3(6) . . ?
Cl2 C7 Cl1 104.0(5) . . ?
Cl1A C7 Cl2A 105.2(6) . . ?
Cl2 C7 Cl2A 43.4(3) . . ?
Cl1 C7 Cl2A 145.1(3) . . ?
 
_diffrn_measured_fraction_theta_max    0.994
_diffrn_reflns_theta_full              27.46
_diffrn_measured_fraction_theta_full   0.994
_refine_diff_density_max    0.609
_refine_diff_density_min   -0.491
_refine_diff_density_rms    0.078
